# Supplementary material
Source: Springer Nature journal article supplement (https://www.springermedizin.de/resource/supplementary/13256_2013_2726_MOESM4_ESM.pdf/9651274)

# Corrected calcium levels

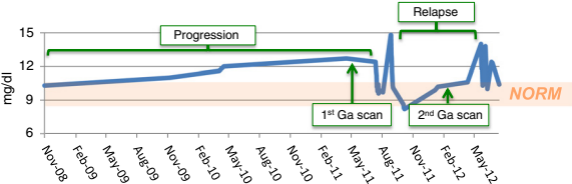

Supplement: MOESM4 [file 9651274]
